# Supplementary material
Source: PubMed Central journal article supplement (PMC2785436)

# Supplemental Figure 1

Wedge Stimulus

(a)

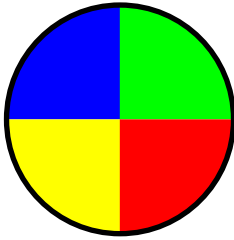

14 Subject Average  
(14 Sessions)

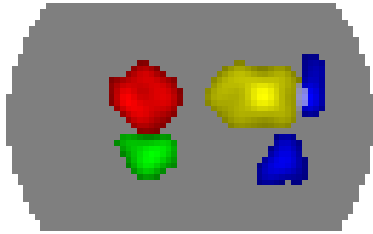

Ring Stimulus

(c)

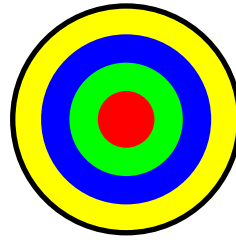

14 Subject Average  
(14 Sessions)

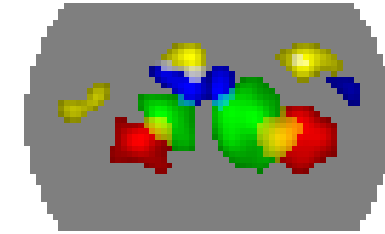

Supplement: NIHMS143837-supplement-01.pdf [file NIHMS143837-supplement-01.pdf]
