# Supplementary material
Source: PubMed Central journal article supplement (PMC2785436)

# Supplemental Figure 2

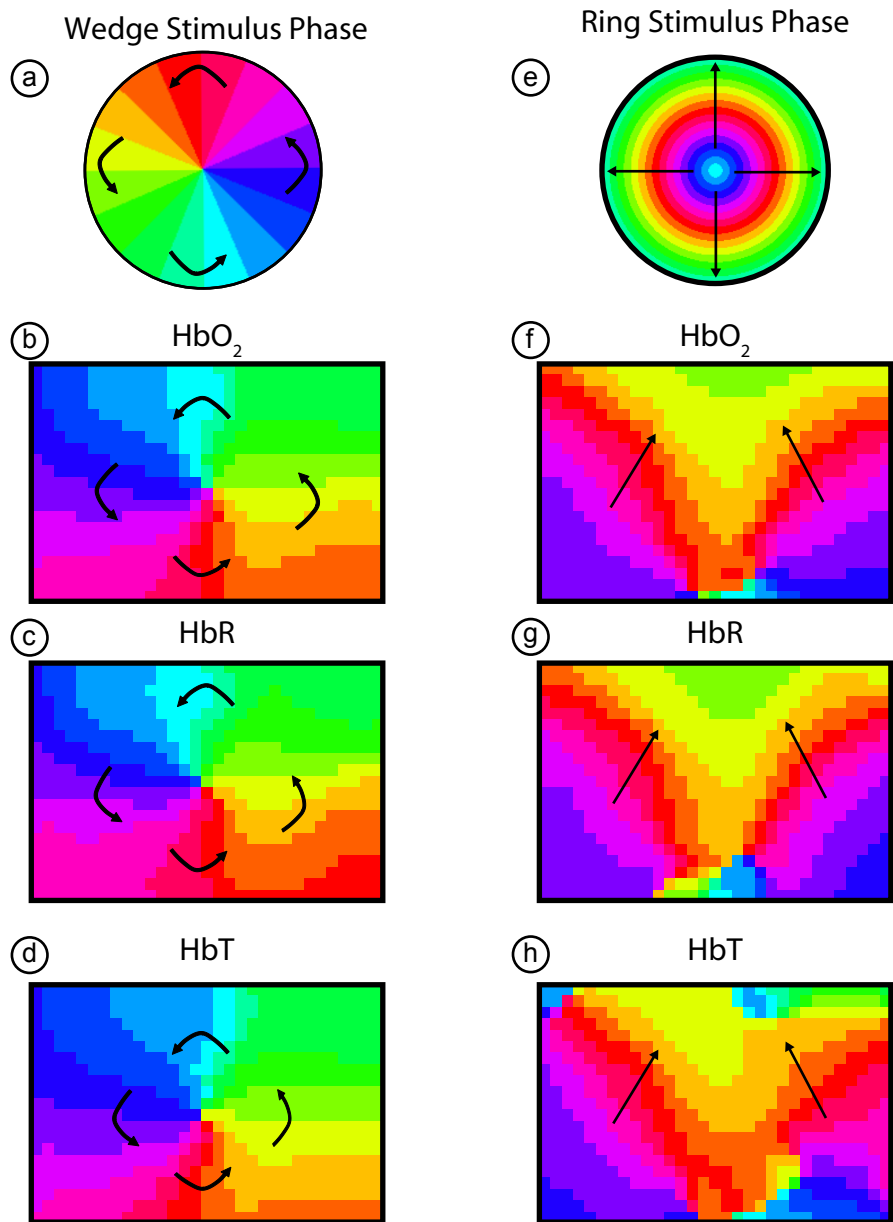

Supplement: NIHMS143837-supplement-02.pdf [file NIHMS143837-supplement-02.pdf]

# Supplemental Figure 3

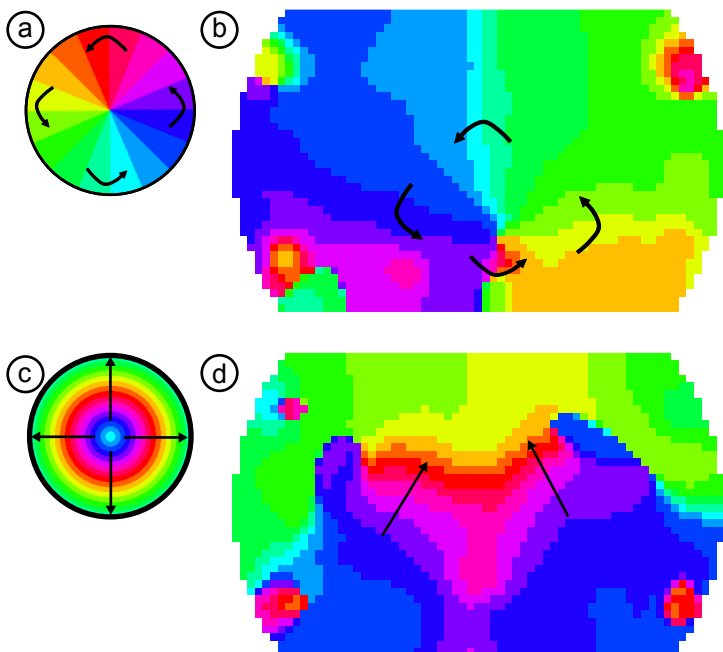

Supplement: NIHMS143837-supplement-03.pdf [file NIHMS143837-supplement-03.pdf]
